# Supplementary material
Source: PubMed Central journal article supplement (PMC7695073)
Supplement: tpmd200209.SD1.pdf [file tpmd200209.SD1.pdf]

Appendix *online* 1

Types of comorbidities as registered in SINAN-TB

| Comorbidities                     | Total | (%) |
|-----------------------------------|-------|-----|
| Von Willebrand Disease            | 1     | 5   |
| Falciform Anemia                  | 2     | 10  |
| Anemia not specified              | 1     | 5   |
| Desnutrition                      | 1     | 5   |
| Sistemic Lupus Erythematosus      | 1     | 5   |
| Juvenile Arthritis Rheumatoid #   | 2     | 10  |
| Lymphoma                          | 1     | 5   |
| Hepatitis C                       | 1     | 5   |
| Desnutrition and Cerebral Palsy   | 1     | 5   |
| IGG Deficiency                    | 1     | 5   |
| Renal Agenesis                    | 1     | 5   |
| Chron Disease                     | 1     | 5   |
| Neuropathy not especified         | 1     | 5   |
| Epilepsy                          | 1     | 5   |
| Cardiac arrhythmia not especified | 1     | 5   |
| Asthma                            | 3     | 15  |
| Total                             | 20    | 100 |
